# Supplementary material for: SMAD4 Loss in Colorectal Cancer Patients Correlates with Recurrence, Loss of Immune Infiltrate, and Chemoresistance
Source: Oxford University Press journal article supplement (doi:10.1158/1078-0432.ccr-18-1726), 2018-12-26
Supplement: 10780432ccr181726-sup-202537_3_supp_5176347_pzzhd3.docx [file 10780432ccr181726-sup-202537_3_supp_5176347_pzzhd3.docx]

**Supplementary Table 1. Ratio and concentrations of FOLFOX.**

| **Agent** | **Ratio** | **1x Conc (µM)** | **2x Conc (µM)** | **4x Conc (µM)** |
| --- | --- | --- | --- | --- |
| 5-FU (µM) | 25 | 3.90625 | 7.8125 | 15.625 |
| Leucovorin (µM) | 5 | 0.78125 | 1.5625 | 3.125 |
| Oxaliplatin (µM) | 1 | 0.15625 | 0.3125 | 0.625 |
