# Supplementary material for: SMAD4 Loss in Colorectal Cancer Patients Correlates with Recurrence, Loss of Immune Infiltrate, and Chemoresistance
Source: Oxford University Press journal article supplement (doi:10.1158/1078-0432.ccr-18-1726), 2018-12-26
Supplement: 10780432ccr181726-sup-202537_3_supp_5187682_pnv7mc.docx [file 10780432ccr181726-sup-202537_3_supp_5187682_pnv7mc.docx]

Supplementary Figure 1: Kaplan-Meier graphs with number of subjects at risk comparing recurrence-free survival (RFS) by (a) TIL status, or (b) PLA status, with arrows indicating patients whose tumors were also SMAD4 loss.

Supplementary Figure 2: Kaplan-Meier graph with number of subjects at risk comparing (a) SMAD4, (b) TIL, and (c) PLA status, separately, as well as (d) SMAD4 and TIL, and (e) SMAD4 and PLA, together, with recurrence-free survival (RFS) among only the MMR-proficient patients.

Supplementary Figure 3: Kaplan-Meier graphs in the validation cohort with number of subjects at risk showing colorectal cancer-specific survival according to SMAD4 status.
